# Supplementary material for: Theoretical design of platinum–sliver single atom alloy catalysts with CO adsorbate-induced surface structures
Source: Royal Society of Chemistry journal article supplement (doi:10.1039/d2cp02107b), 2022-01-01
Supplement: d2cp02107b1.pdf [file d2cp02107b1.pdf]

## Supporting Information

### Theoretical design of platinum-silver single atom alloy catalyst with CO adsorbate-induced surface structures

Minghao Hua<sup>1</sup>, Xuelei Tian<sup>1,\*</sup>, Shuo Li<sup>1</sup>, Anchen Shao<sup>1</sup>, Xiaohang Lin<sup>1,\*</sup>

<sup>1</sup> Key Laboratory for Liquid-Solid Structural Evolution and Processing of Materials,  
Ministry of Education, School of Materials Science and Engineering, Shandong  
University, 250061, Jinan, China

**\* Correspondence:**

Xiaohang Lin

lxh12345@sdu.edu.cn

Xuelei Tian

tianxuelei@sdu.edu.cn

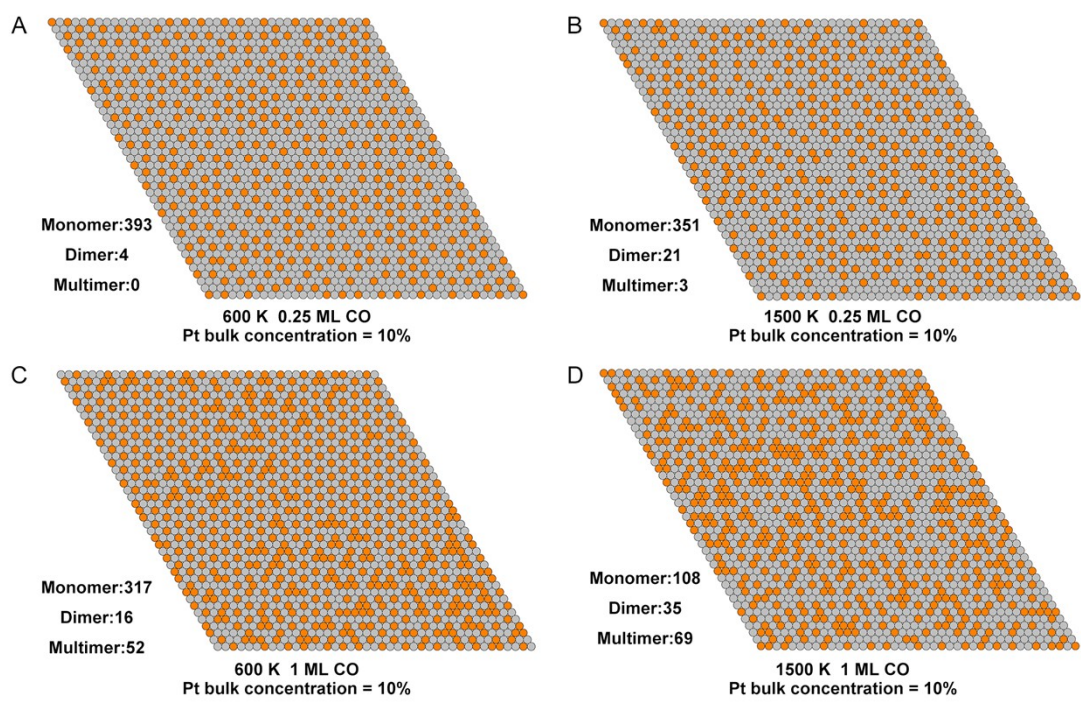

Figure S1 MC snapshots of the atomic structures of CO/Vac-Pt/Ag(111) with 10% Pt and CO coverage of 0.25ML and 1 ML at 600 K and 1500 K.

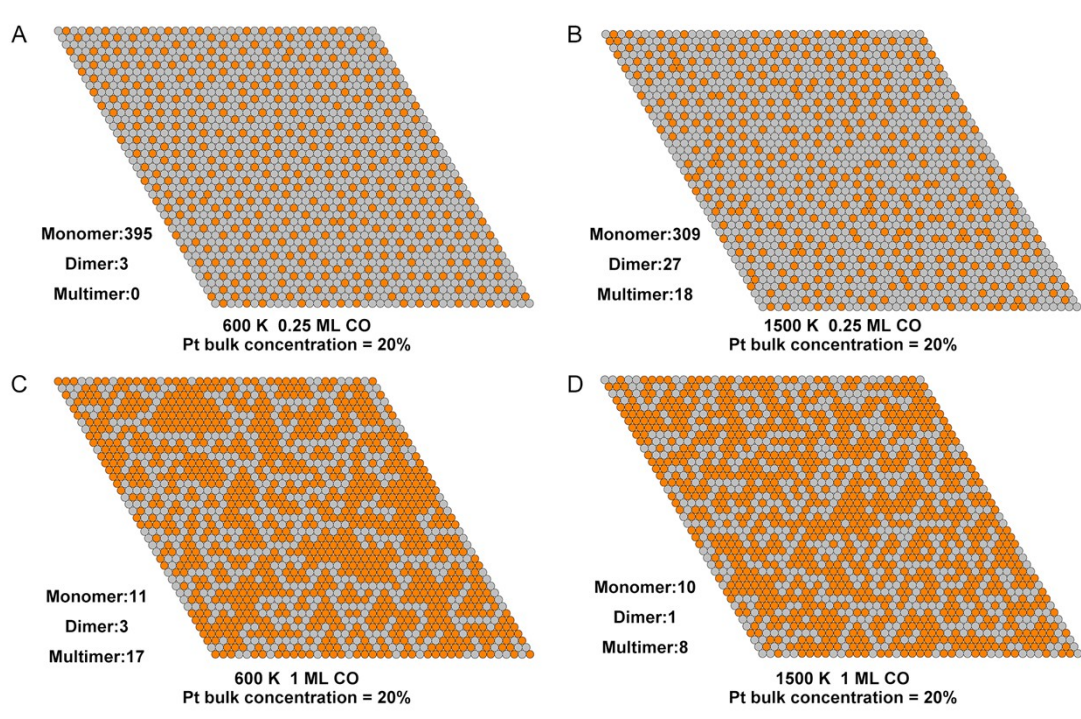

Figure S2 MC snapshots of the atomic structures of CO/Vac-Pt/Ag(111) with 20% Pt and CO coverage of 0.25ML and 1 ML at 600 K and 1500 K.

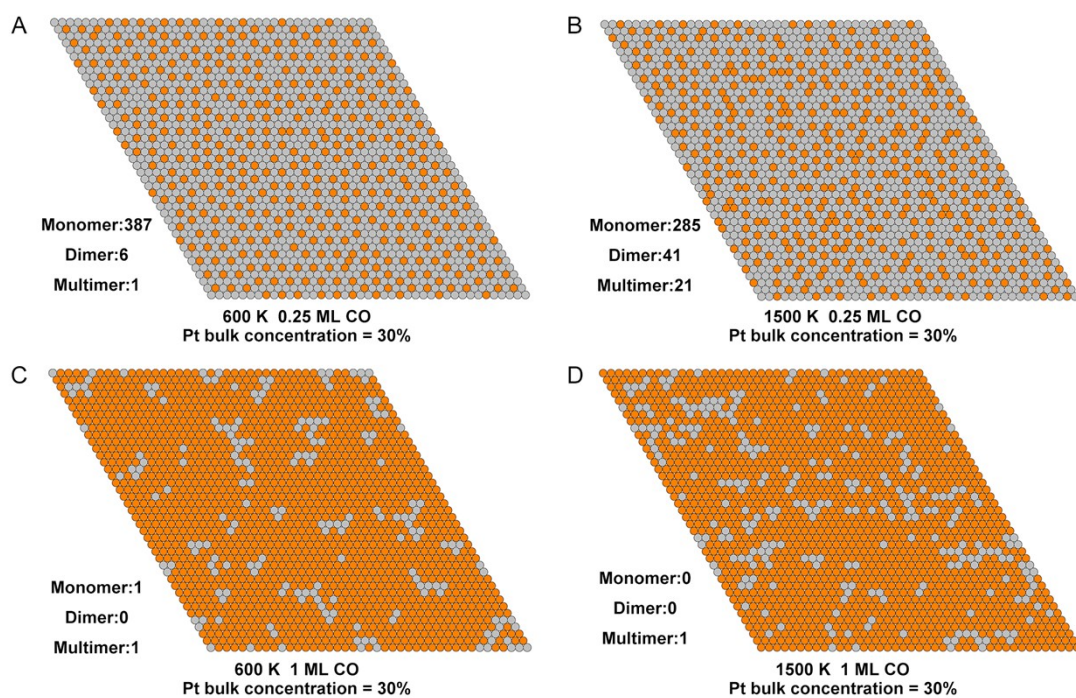

Figure S3 MC snapshots of the atomic structures of CO/Vac-Pt/Ag(111) with 30% Pt and CO coverage of 0.25ML and 1 ML at 600 K and 1500 K.

Table S1 The free energies of the four e- ORR reactions on Pd<sub>3</sub>Ag(111) surface without and with solvent, as well as the corresponding theoretical limiting potential and overpotential.

| Surface model   | $\Delta G_1(eV)$ | $\Delta G_2(eV)$ | $\Delta G_3(eV)$ | $\Delta G_4(eV)$ | $U_L(V)$ | $\eta(V)$ |
|-----------------|------------------|------------------|------------------|------------------|----------|-----------|
| without solvent | -1.01            | -2.19            | -0.91            | -0.82            | 0.82     | 0.41      |
| with solvent    | -1.24            | -1.95            | -0.94            | -0.79            | 0.79     | 0.44      |
